# Supplementary material for: Cell type-specific deletion in mice reveals roles for PAS kinase in insulin and glucagon production
Source: PubMed Central journal article supplement (PMC4969360; doi:10.1007/s00125-016-4025-1), 2016-06-24
Supplement: 125_2016_4025_MOESM1_ESM.pdf [file 125_2016_4025_MOESM1_ESM.pdf]

## SUPPLEMENTARY METHODS

### *Generation of Pask cKO mice.*

A conditional knock-out strategy, flanking exons 12 and 15 with LoxP sites, was used to target the *Pask* locus in order to generate mice carrying conditional knock-out alleles at this site. The targeting vector was built using homologous recombination in bacteria BHR [1]. A C57 mouse bacterial artificial chromosome (BAC) served as template for the extraction of homology arms of the targeting vector (See Table). The 18 kb targeting vector, *Pask cKOTV*, contained a floxed neomycin phosphotransferase, Neo, selectable marker cassette, inserted 204 bp downstream of exon 11 and 200 bp upstream of exon 12. After linearization, the targeting construct was electroporated into AZX1, a C57Bl/6J OlaHsd derived ES cell line. PCR screens and Southern blot analyses (not shown) revealed that 4 out of 58 G418-resistant clones had undergone the desired homologous recombination. One of these clones was expanded and injected into Balb/c OlaHsd blastocysts to generate chimeric mice. Chimeric males were bred to C57Bl/6J OlaHsd females and black-coated offspring were genotyped on both sides of the homology arms for correct integration into the *Pask* locus. A forward primer (F1) in intron 9 outside the short arm homology combined with a reverse Neo-specific primer (R1) giving a PCR product of 3461 bp, and a LoxP specific primer F2 combined with a reverse primer outside the long arm, giving a PCR product of 6862 bp, was used for screening (Table 1).

|                |                                                                                  |
|----------------|----------------------------------------------------------------------------------|
| F1:            | TCGGTTGTTGTCATGCTAGGATTT                                                         |
| R1:            | TAGTTGCCAGCCATCTGTTGTTT                                                          |
| F2:            | GTTGCATGAGAAAAGCAGACGCGTATAAC                                                    |
| R2:            | TTAGGTGCCTTGTTACCTGGATGTGTT                                                      |
| PASK 3' SA BHR | GGGGGATGCACACCACAACAACCTCATTAAAGGCCTAGCCAAGGGGATATCGCTCATGAGACAATAACCCTG         |
| PASK 5' SA BHR | ATGTAGGACTCTAAATGAATGTATACCTTGTACAGTGGGATGTAGATGCAGTCGACGGCGGTAATACGGTTATCCA     |
| PASK 5' DF BHR | GGCCCTCTGGCAGTGTCCAGCCATCAACCCAAACTGGCTTATGTCTAAAGCGGCCGCTCATGAGACAATAACCCTG     |
| PASK 3' DF BHR | TGGGATGTGTTATCTCTGAGTGAGTGGTCTGGGTTGCATGAGAAAAGCAGACGCGTGGCGGTAATACGGTTATCCA     |
| PASK LA 5' BHR | GGAAGTGAAGCAGAGACCGTGGAGGAATCCTGTTTACTAGCTTGCTCAATCCTAGGACGTCTCATGAGACAATAACCCTG |
| PASK LA 3' BHR | TCAGTAGGTGCGCCAGGCCAAACAATGCGGCTGGTTCGGTGGTCAAAAACTCGAGGCGGTAATACGGTTATCCA       |

Table 1: **Primer sequences used in the generation of the *Pask* floxed alleles.** Black: amplification of *Pask* sequences. Red: amplification of beta lactamase –ColE1 ori from pSK bluescript. Underlined: Restriction sites used for cloning of target vector.

### ***In vivo* physiology**

*Intraperitoneal glucose tolerance test (IPGTT).* Mice fasted for 16 h (with free access to water) were injected intraperitoneally with 1g glucose/kg, and blood glucose levels in tail vein blood measured with an automatic glucometer (Accucheck Compact Plus; Roche, Burgess Hill, UK). *In vivo glucose-stimulated insulin secretion.* Mice fasted for 16 h were intraperitoneally injected with 3g glucose/kg and tail vein blood collected into heparin-coated tubes (Sarstedt). Plasma was measured using an ultrasensitive mouse insulin ELISA kit (Merckodia, Uppsala, Sweden) or by radioimmunoassay (Linco/Millipore, Watford, U.K.). *Insulin tolerance tests.* Bovine insulin (0.75 U/kg; ActaRapid, NovoNordisk) was injected intraperitoneally into 16 h-fasted mice before glucose assay. *Plasma glucagon.* Blood (400-800 µl) was removed by cardiac puncture from either fed or overnight fasted mice terminally anaesthetized with Pentobarbital. Plasma was collected and centrifuged (2,000 g, 5

min.) in heparin-coated tubes (Microvette; Sarstedt, Leicester, UK) and plasma glucagon assessed by radioimmunoassay (Millipore/Linco). *Hyperinsulinemic/Hypoglycaemic clamps* were performed by perfusion of insulin and glucose solutions through a jugular catheter as described [2].

### **RNA extraction, reverse transcription and real time quantitative PCR (RT-qPCR)**

Total cellular RNA from mouse islets or other tissues was obtained using TRIzol reagent (Invitrogen, Paisley, UK), and RNA was further purified against DNA contamination with a DNA-free kit (Applied biosystems, Warrington, UK). Total RNA (1.5–2 µg) was then reverse transcribed into cDNA with a high-capacity reverse transcription kit (Applied Biosystems) according to the manufacturer's instructions. qPCR was conducted using SYBR green (Applied Biosystems) on an ABI 7500 fast real time PCR machine.

### **Islet isolation and *in vitro* glucose stimulated insulin secretion (GSIS)**

After sacrifice by cervical dislocation, islets were purified on histopaque gradients and hand-picked as described [3;4]. Islets were cultured in RPMI medium supplemented with 2 mM glutamine, 100 units/ml of penicillin, and 100 units/ml of streptomycin and 10% (v/v) heat-inactivated fetal bovine serum for 24–72 h. For *in vitro* measurement of glucose- and KCl-stimulated insulin secretion, 10 size-matched islets were preincubated for 1 h at 37 °C in Krebs-Ringer buffer (KRB, in mM: 130 NaCl, 3.6 KCl, 1.5 CaCl<sub>2</sub>, 0.5 MgSO<sub>4</sub>, 0.5 KH<sub>2</sub>PO<sub>4</sub>, 2 NaHCO<sub>3</sub>, 10 HEPES, and 0.1% (w/v) BSA, pH 7.4, equilibrated for 20 min with O<sub>2</sub>/CO<sub>2</sub> (95:5 (v/v)) at 37 °C) containing 3 mM glucose, with gentle agitation (120 rpm). Islets were further incubated for 2 h at 37 °C in KRB at 3 or 16.7 mM glucose. Secreted and total insulin levels were measured in triplicate by radioimmunoassay (Millipore, Watford, UK).

### **Glucagon secretion *in vitro***

Secretion from islets (15–20 per condition, size-matched) was measured in 0.5 mL KRB solution containing 0.5 or 10 mM glucose as described [2].

### **Optical projection tomography (OPT) and immunohistochemistry**

Beta and alpha cell mass were assessed as previously described [5-7] on pancreata from 20 week old mice. Briefly, isolated pancreases were fixed in 10% buffered formalin and embedded in paraffin wax within 24 h of removal. Head-to-tail sections (5  $\mu$ m lengthwise) were cut and incubated overnight at 37°C on superfrost slides. Slides were submerged sequentially in HistoClear (Sigma) followed by decreasing concentrations of industrial methylated spirits for removal of paraffin wax. Anti-PASK antibody (Pierce, PA5-29309) was used at 1:10 dilution following antigen retrieval (Vector antigen unmasking solution, Vector Biolabs). Images were captured on a Zeiss Axio Observer.Z1 Motorised Inverted Widefield Microscope fitted with a Hamamatsu Flash 4.0 Camera using Plan-Apochromat 20x/0.8 M27 air objective with Colibri.2 LED illumination. Data acquisition was controlled by Zeiss Zen Blue 2012 software configured at a bit depth of 16-bit and binning mode 2x2. Whole tissue tiled preview scans were obtained using an EC Plan-Neofluar 10x/0.3 Ph1 air objective with phase contrast. Excitation intensities and exposure times were kept constant for all images, including the negative controls. Image analysis was performed using Volocity (Invitrogen) and Fiji [8], as previously described [5-7].

### Reference List

1. Datsenko KA, Wanner BL (2000) One-step inactivation of chromosomal genes in *Escherichia coli* K-12 using PCR products. *Proc.Natl.Acad.Sci.U.S.A.* 97: 6640-6645
2. Solomou A, Meur G, Bellomo E, et al (2015) The zinc transporter Slc30a8/ZnT8 is required in a subpopulation of pancreatic alpha cells for hypoglycemia-induced glucagon secretion. *J.Biol.Chem.* in press:

3. Sun G, Tarasov AI, McGinty JA, et al (2010) LKB1 deletion with the RIP.Cre-transgene modifies pancreatic {beta}-cell morphology and enhances insulin secretion in vivo. *Am.J.Physiol Endocrinol.Metab.* 298: E1261-E1273
4. Ravier MA, Rutter GA (2010) Isolation and culture of mouse pancreatic islets for ex vivo imaging studies with trappable or recombinant fluorescent probes. *Methods Mol.Biol.* 633: 171-184
5. da S, X, Farhan H, Kim H, et al (2011) Per-arnt-sim (PAS) domain-containing protein kinase is downregulated in human islets in type 2 diabetes and regulates glucagon secretion. *Diabetologia.* 54: 819-827
6. Alanentalo T, Asayesh A, Morrison H, et al (2007) Tomographic molecular imaging and 3D quantification within adult mouse organs. *Nat.Methods.* 4: 31-33
7. Mondragon A, Davidsson D, Kyriakoudi S, et al (2014) Divergent effects of liraglutide, exendin-4, and sitagliptin on beta-cell mass and indicators of pancreatitis in a mouse model of hyperglycaemia. *PLoS.ONE.* 9: e104873
8. Schindelin J, Arganda-Carreras I, Frise E, et al (2012) Fiji: an open-source platform for biological-image analysis. *Nat.Methods.* 9: 676-682

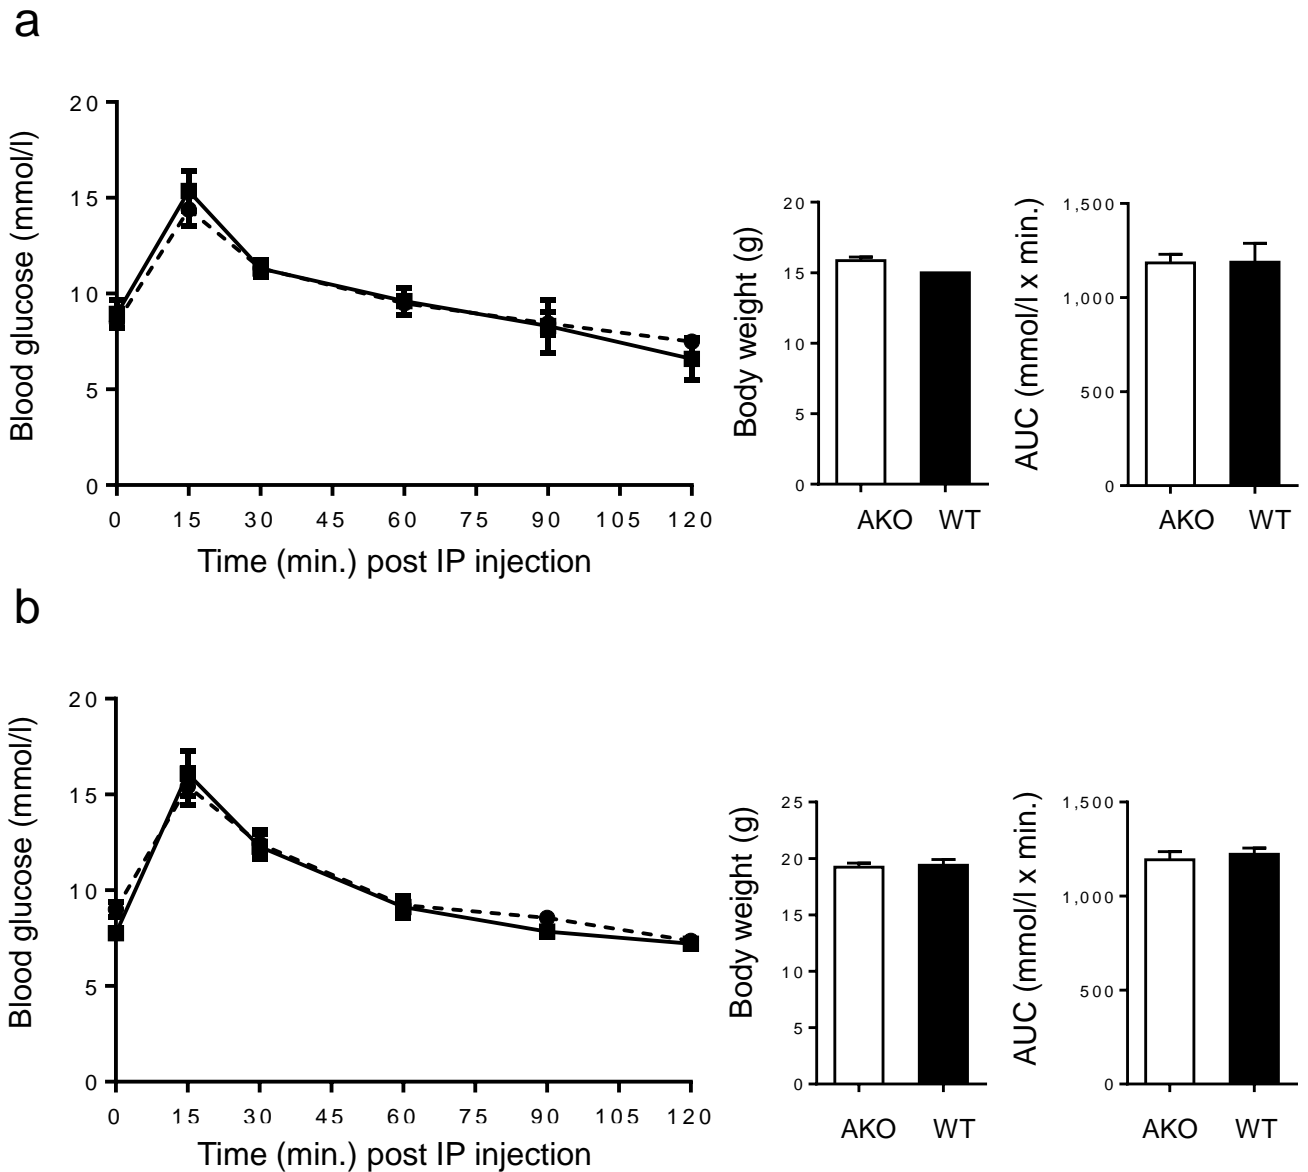

**ESM Fig. 1:** Female *PaskAKO* mice display normal glucose tolerance after intra-peritoneal glucose injection. (a) From left to right: IPGTT, body weight and area under the curve (AUC) for *PaskAKO* (circles, dashed line) and WT (squares, solid line) for 7-8 week old mice (*PaskAKO*,  $n=7$ , wild type,  $n=2$ ). (b) as (a) but for animals at 11-12 weeks (*PaskAKO*,  $n=9$ , wild type,  $n=5$ ).
